# Supplementary material for: Cordidepsine is A Potential New Anti-HIV Depsidone from Cordia millenii, Baker
Source: MDPI journal article supplement (doi:10.3390/molecules24173202), 2019-09-03
Supplement: s1 [file s1]

# Cordidepsine is a potential new anti-HIV depsidone from *Cordia millenii*, Baker.

Rostanie Dongmo Zeukang<sup>1,2</sup>, Xavier Siwe-Noundou<sup>3\*</sup>, Maurice Tagatsing Fotsing<sup>1</sup>, Turibio Tabopda Kuiate<sup>1</sup>, Joseph Tanyi Mbafor<sup>1</sup>, Rui W. M. Krause<sup>3</sup>, Muhammad Iqbal Choudhary<sup>2</sup> and Alex de Théodore Atchadé<sup>1\*</sup>

<sup>1</sup> Department of Organic Chemistry, University of Yaoundé I, Faculty of Science, 812 Yaoundé, Cameroon; zeukangrostanie@yahoo.com (R.D.Z.), alexiode@yahoo.fr (A.T.A.), ttabopda@yahoo.fr (T.T.K), ftagat@yahoo.com (M.T.F.), mbaforjt53@gmail.com (J.T.M.)

<sup>2</sup> International Center for Chemical and Biological Sciences, H.E.J Research Institute of Chemistry, University of Karachi, Karachi-75270, Pakistan; iqbal.choudhary@iccs.edu (M.I.C.)

<sup>3</sup> Department of Chemistry, Rhodes University, Grahamstown 6140, South Africa; xavsiw@gmail.com / x.siwenoundou@ru.ac.za (X.S.N.), r.krause@ru.ac.za (R.W.M.K.)

\* Correspondence: xavsiw@gmail.com / x.siwenoundou@ru.ac.za (X.S.N.); alexiode@yahoo.fr (A.T.A.)

Received: date; Accepted: date; Published: date

**Abstract:** Chemical investigation of *Cordia millenii*, Baker resulted in the isolation of a new depsidone, cordidepsine (**1**), along with twelve known compounds including cyclooctasulfur (**2**), lup-20(29)-en-3-triacontanoate (**3**), 1-(26-hydroxyhexacosanoyl)glycerol(**4**), glyceryl-1-hexacosanoate (**5**) betulinic acid (**6**), lupenone (**7**),  $\beta$ -amyrone (**8**), lupeol (**9**),  $\beta$ -amyrin (**10**), allantoin (**11**), 2'-(4-hydroxyphenyl)ethylpropanoate (**12**) and stigmasterol glycoside (**13**). Hemi-synthetic reactions were carried out on two isolated compounds, compounds **5** and **6** to afford two new derivatives i.e. cordicerol A (**14**) and cordicerol B (**15**) respectively. The chemical structures of all the compounds were established based on analysis and interpretation of spectroscopic characterization such as EI-MS, ESI-MS, FAB-MS, 1D and 2D-NMR spectral data as well as X-ray crystallography. Lupeol ester derivatives [Lup-20(29)-en-3-triacontanoate (**3**)], monoglycerol derivatives [1-(26-hydroxyhexacosanoyl)glycerol (**4**) and glyceryl-1 hexacosanoate (**5**)] were isolated for the first time from *Cordia* genus while sulfur allotrope [cyclooctasulfur (**2**)] was isolated for the first time from plant origin. Biological assays such as anti-HIV, cytotoxicity and antibacterial activities were evaluated. Cordidepsine (**1**) exhibited significant anti-HIV integrase activity with  $IC_{50} \sim 4.65 \mu M$ ; EtOAc extract of stem barks, EtOAc fraction of roots and leaves were not toxic against 3T3 cell.

**Keywords:** *Cordia millenii*; Isolation; Depsidone; Cordidepsine; Monoglycerol; Allotrope sulfur; Anti-HIV activity.

### Compound 1 (Cordidepsine)

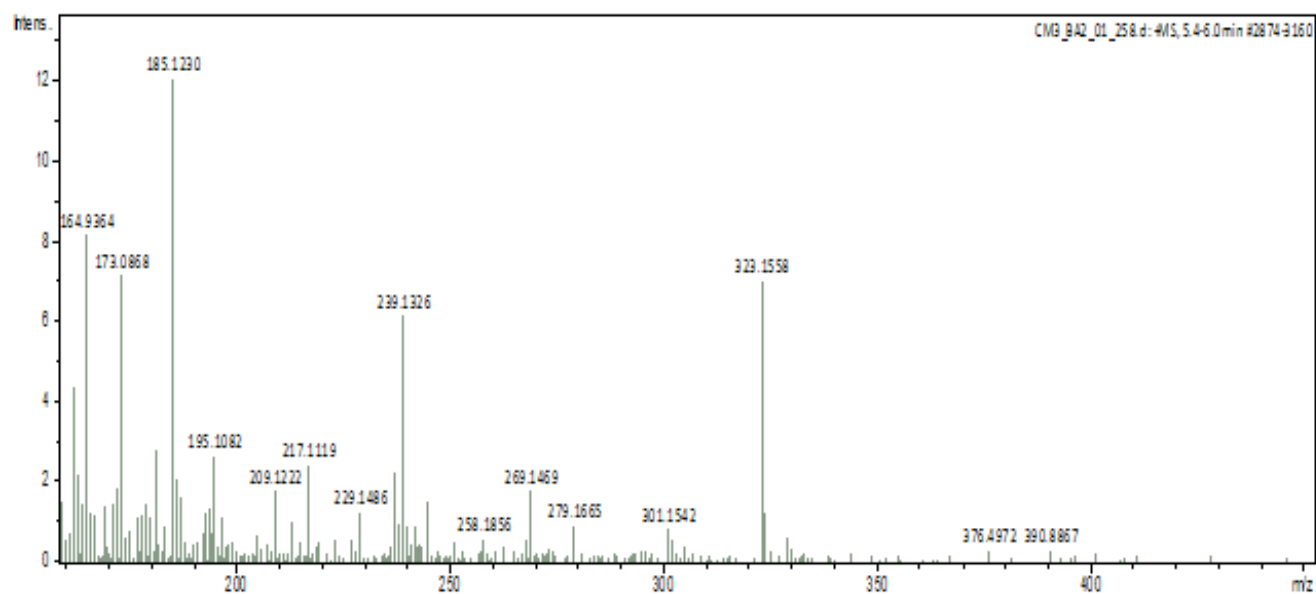

Figure S1. HR-ESI-MS of Cordidepsine (1)

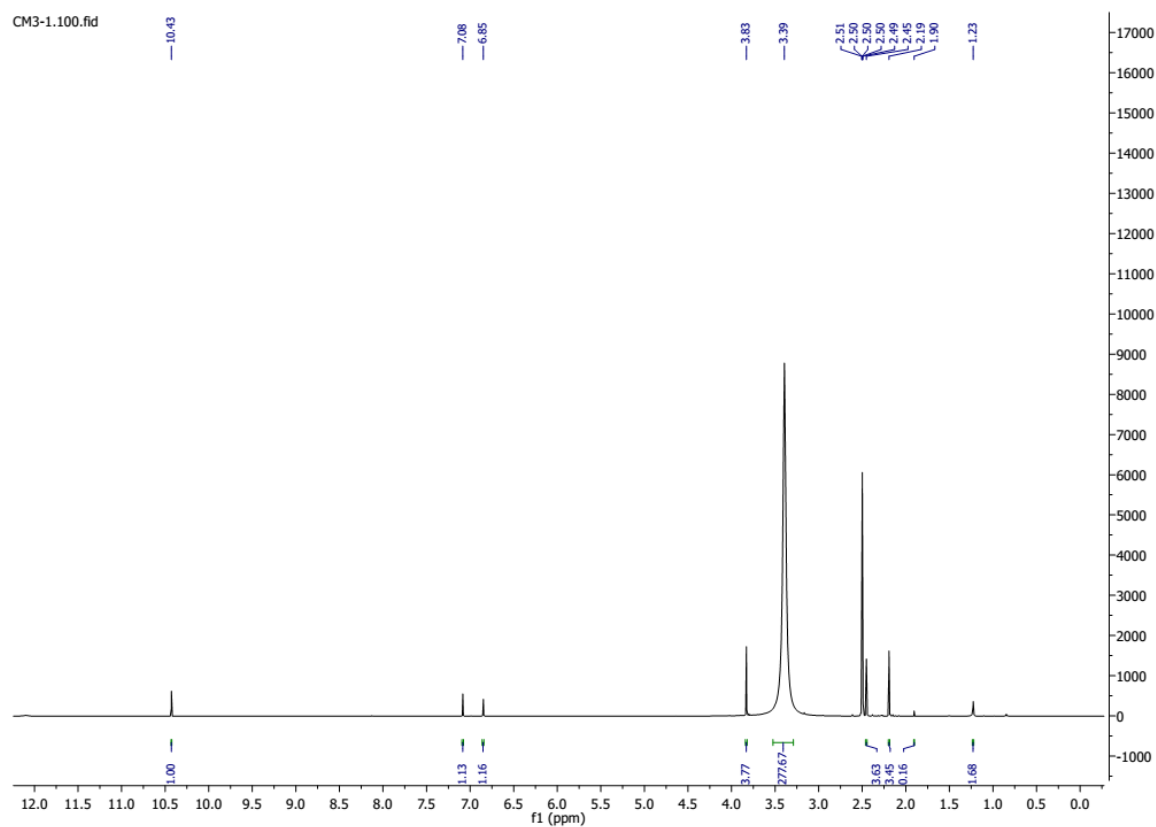

Figure S2. <sup>1</sup>H NMR (600 MHz, DMSO) spectrum of Cordidepsine (1)

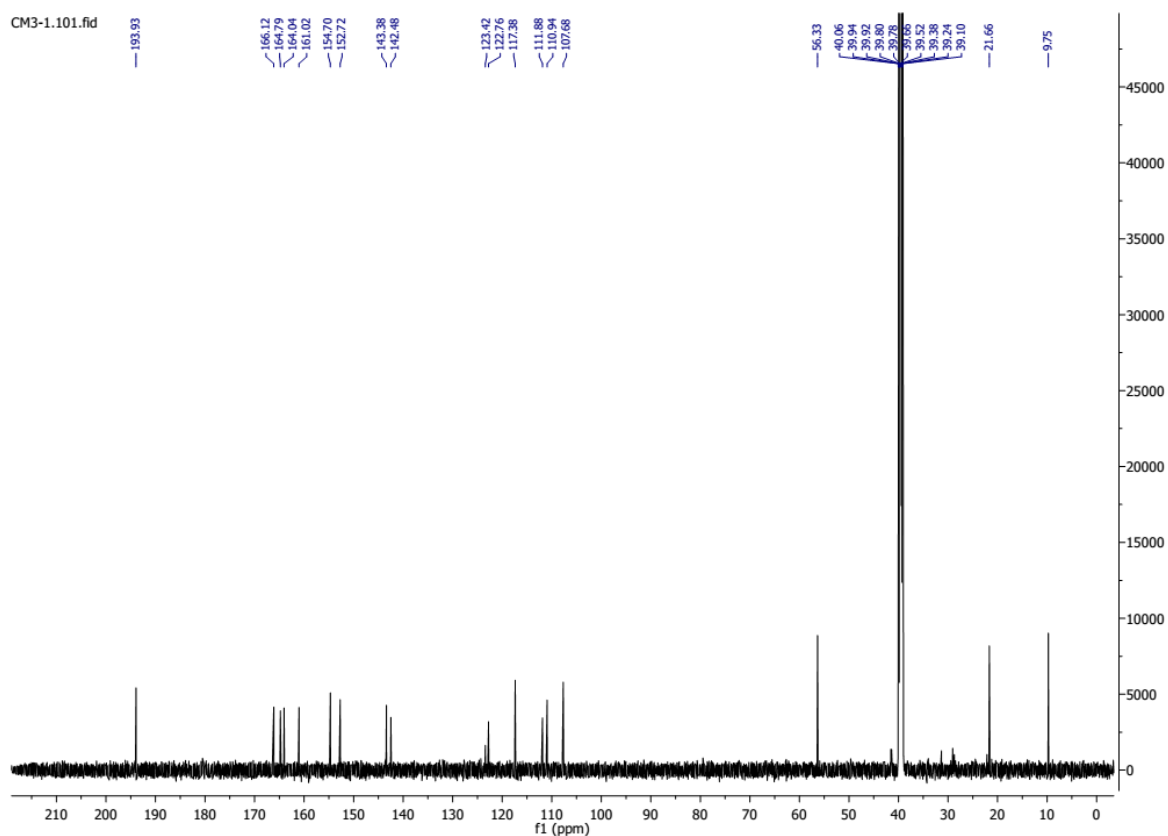

**Figure S3.**  $^{13}\text{C}$  NMR (150 MHz, DMSO) spectrum of Cordidepsine (**1**)

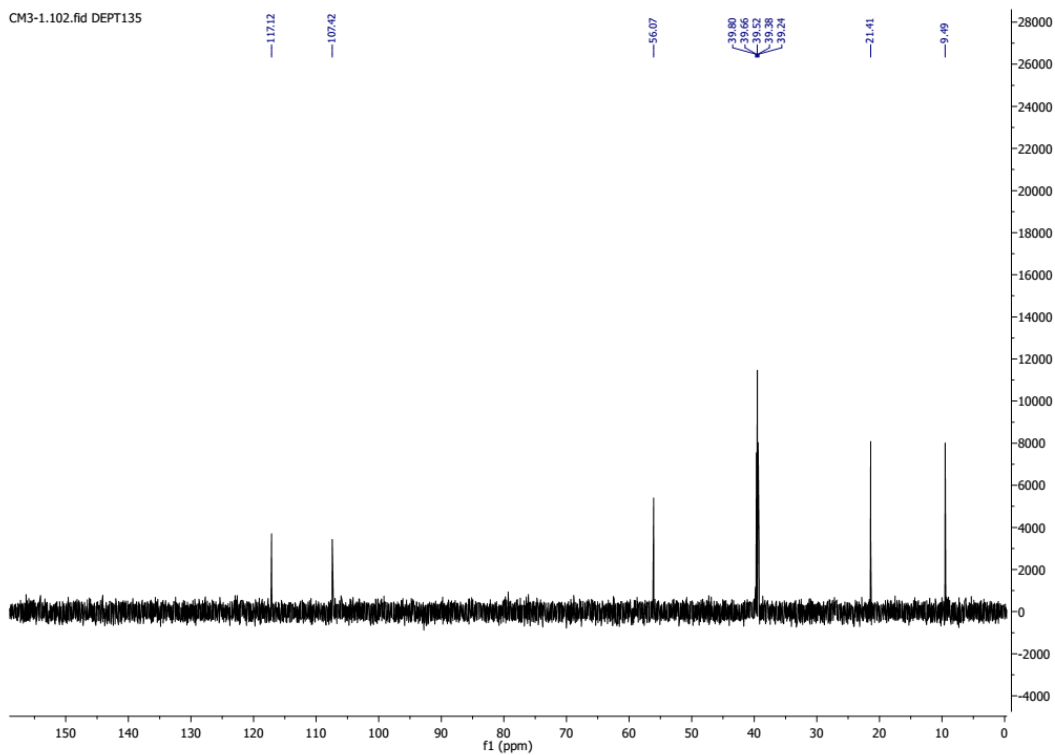

**Figure S4.** DEPT 135 (150 MHz, DMSO) spectrum of Cordidepsine (**1**)

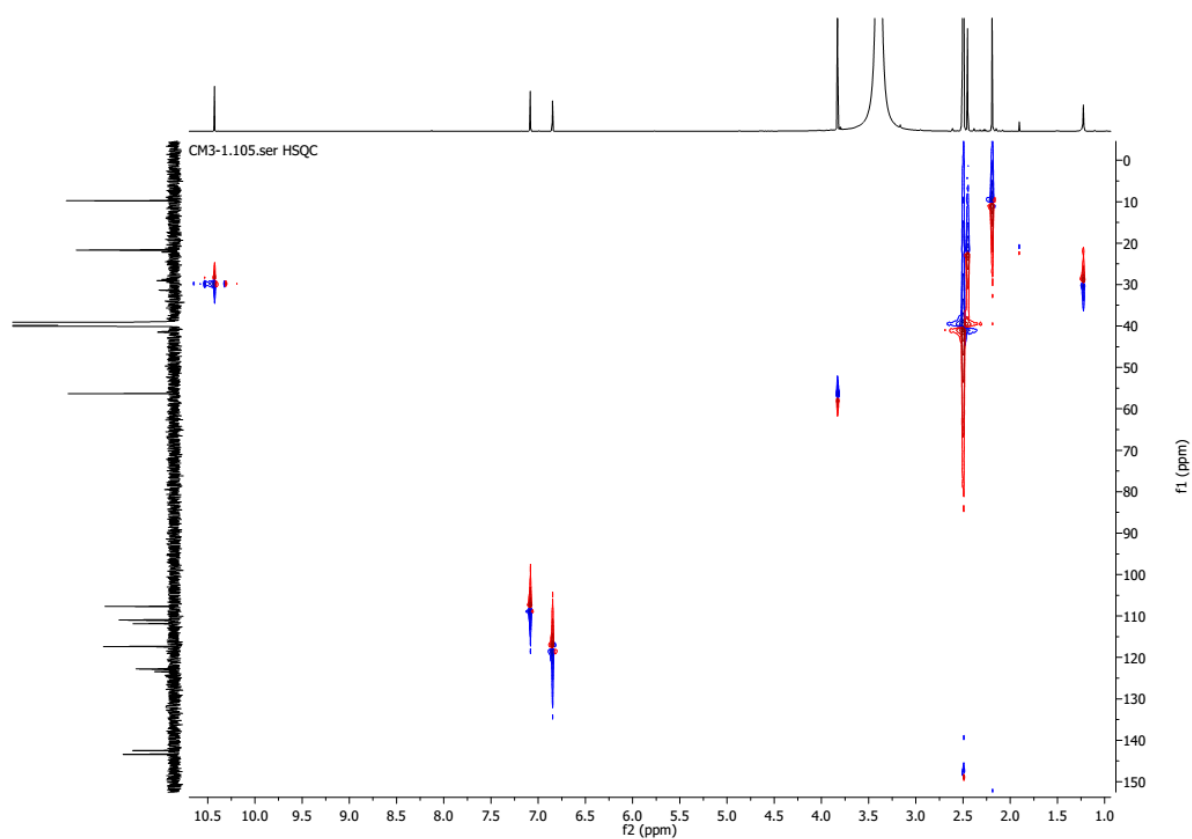

**Figure S5.** HSQC ( $^1\text{H}$ : 600 MHz,  $^{13}\text{C}$  : 150 MHz, DMSO) spectrum of Cordidepsine (1)

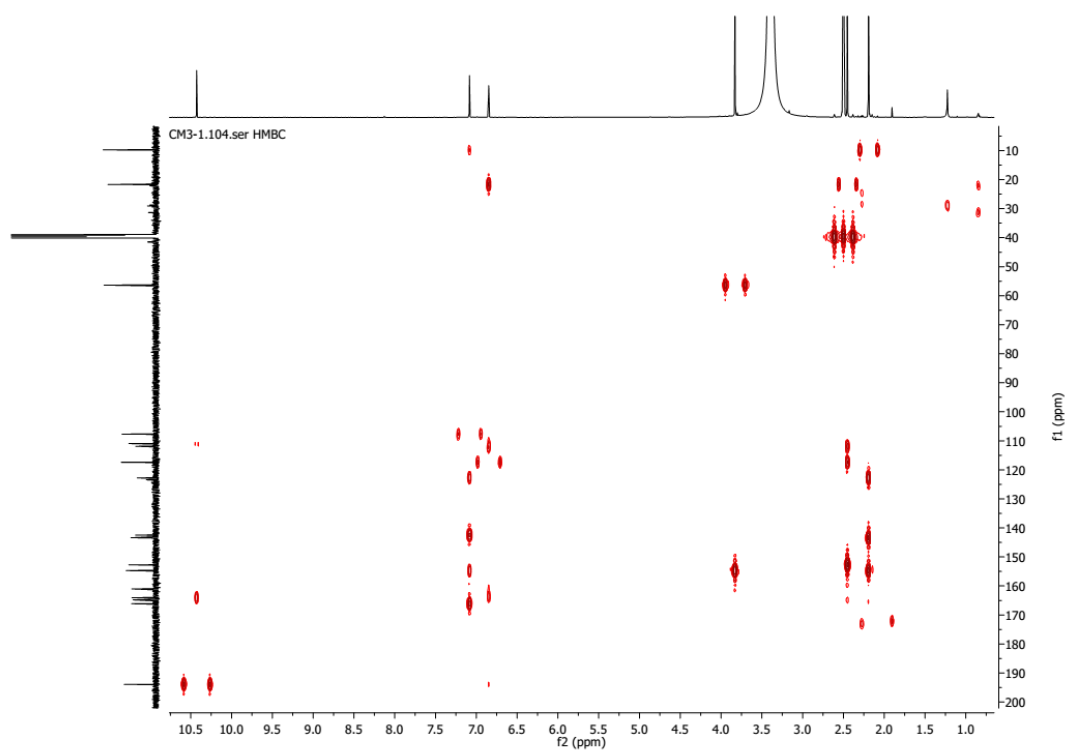

**Figure S6.** HMBC ( $^1\text{H}$ : 600 MHz,  $^{13}\text{C}$ :150 MHz, DMSO) spectrum of Cordidepsine (1)

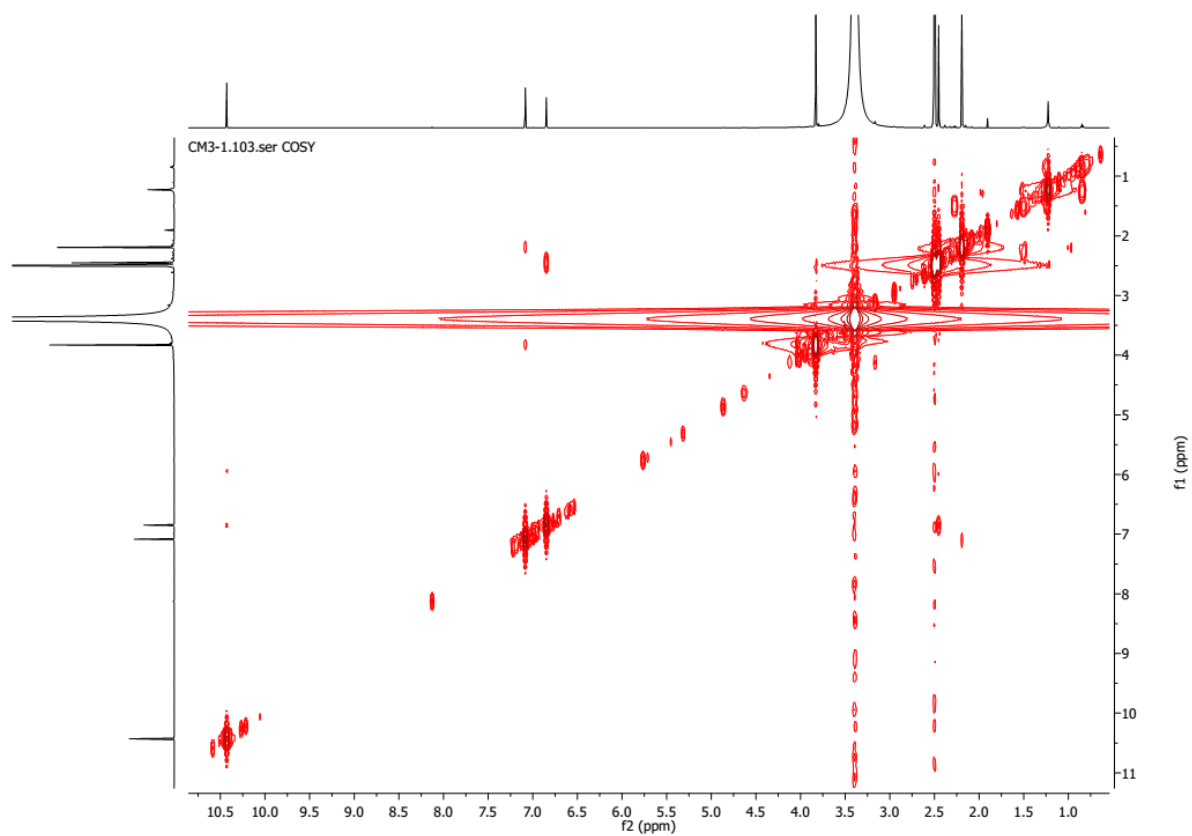

**Figure S7.** COSY (600 MHz, DMSO) spectrum of Cordidepsine (**1**)

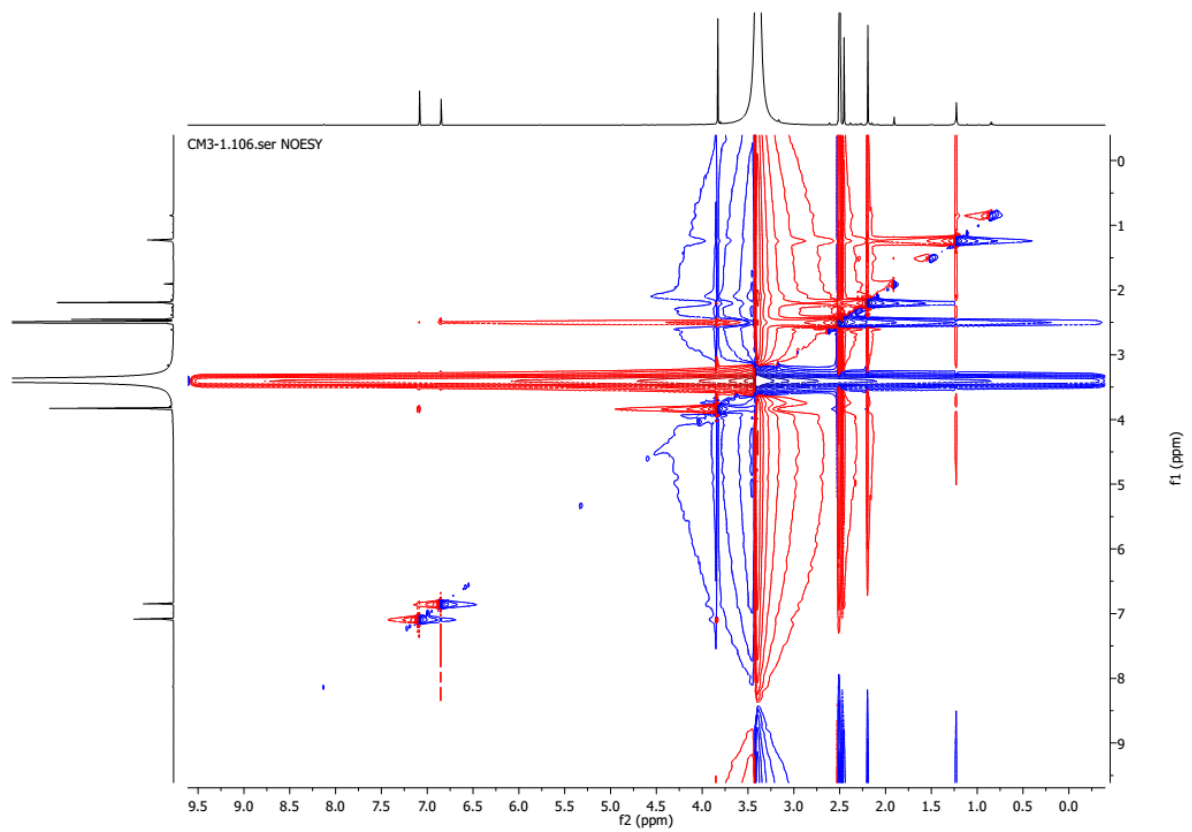

**Figure S8.** NOESY (600 MHz, DMSO) spectrum of Cordidepsine (**1**)

## Compound 14 (Cordicerol A)

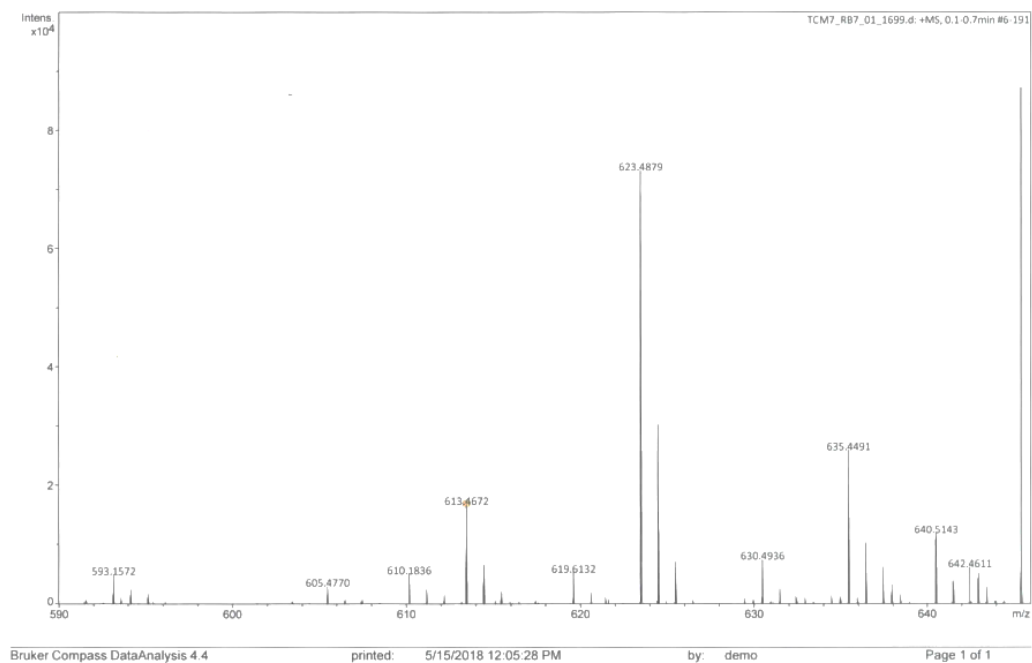

Figure S9. HR-ESI-MS of Cordicerol A (14)

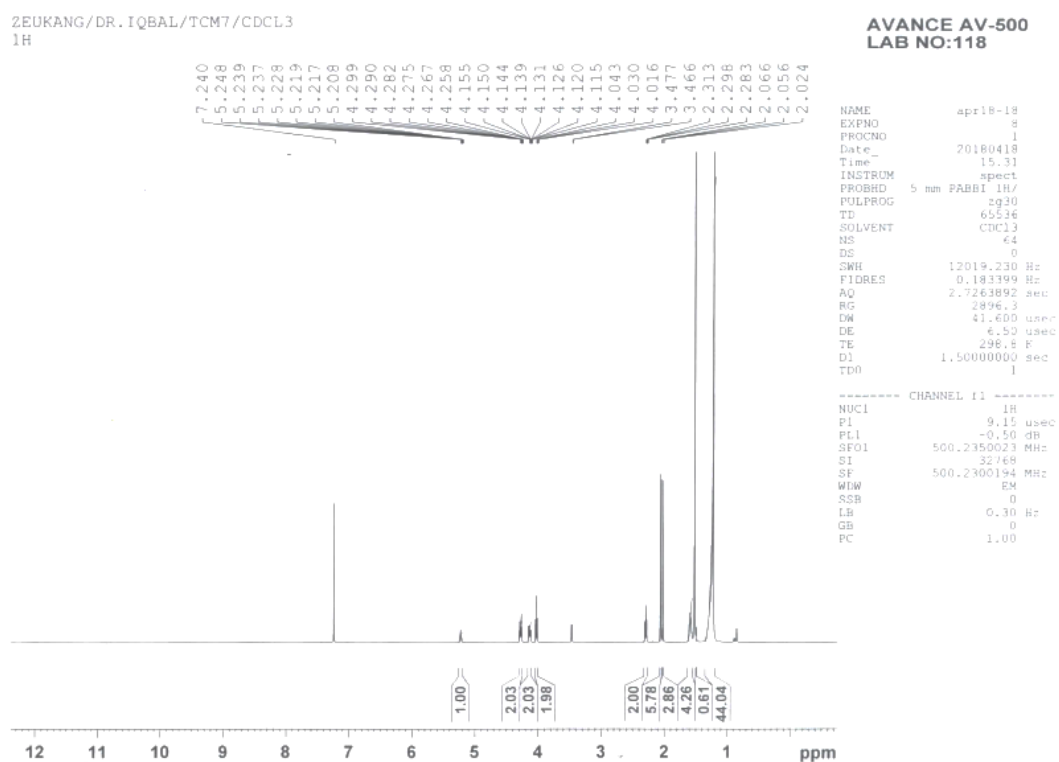

Figure S10. <sup>1</sup>H NMR (500 MHz, CDCl<sub>3</sub>) spectrum of Cordicerol A (14)

Zeukang / Dr. Iqbal / TCM-7 / CDCl<sub>3</sub>  
BB

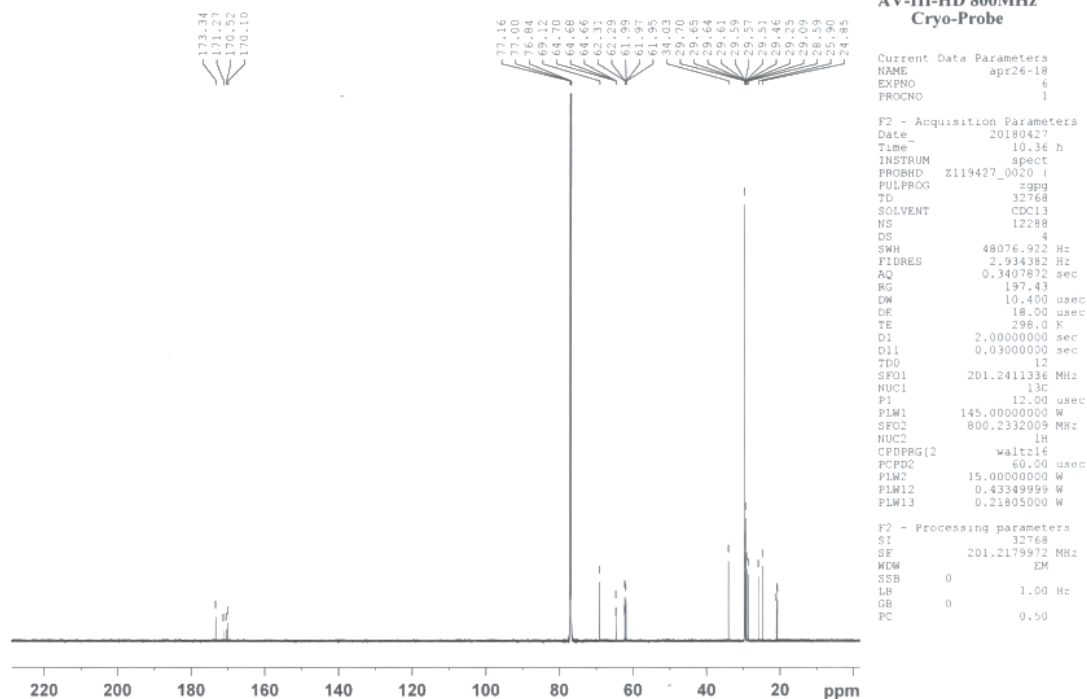

Figure S11. <sup>13</sup>C NMR (200 MHz, CDCl<sub>3</sub>) spectrum of Cordicerol A (14)

Zeukang / Dr. Iqbal / TCM-7 / CDCl<sub>3</sub>  
Dept 135

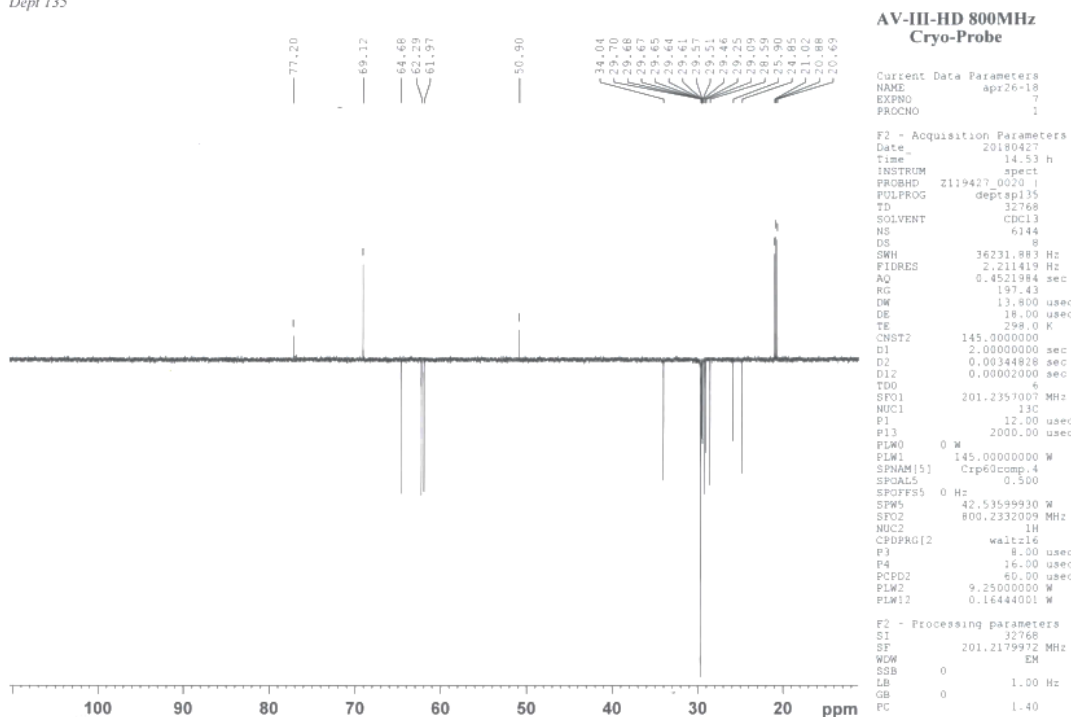

Figure S12. DEPT 135 (200 MHz, CDCl<sub>3</sub>) spectrum of Cordicerol A (14)

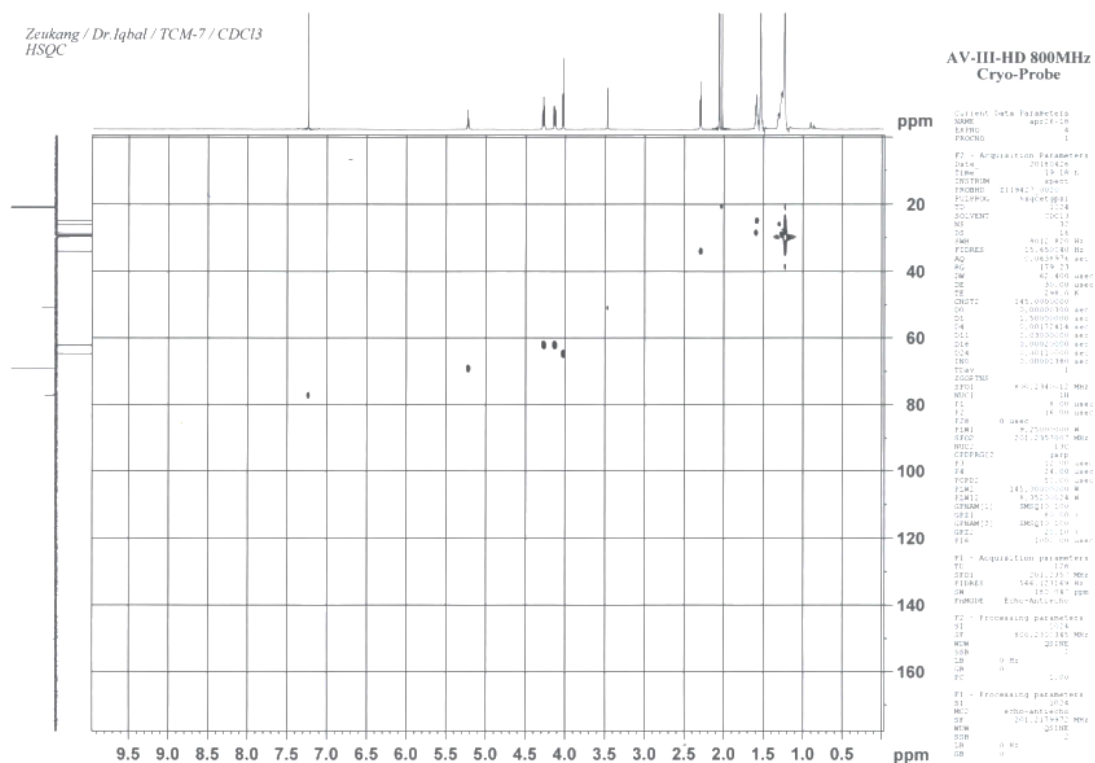

Figure S13. HSQC ( $^1\text{H}$ : 500 MHz,  $^{13}\text{C}$ : 200 MHz,  $\text{CDCl}_3$ ) spectrum of Cordicerol A (14)

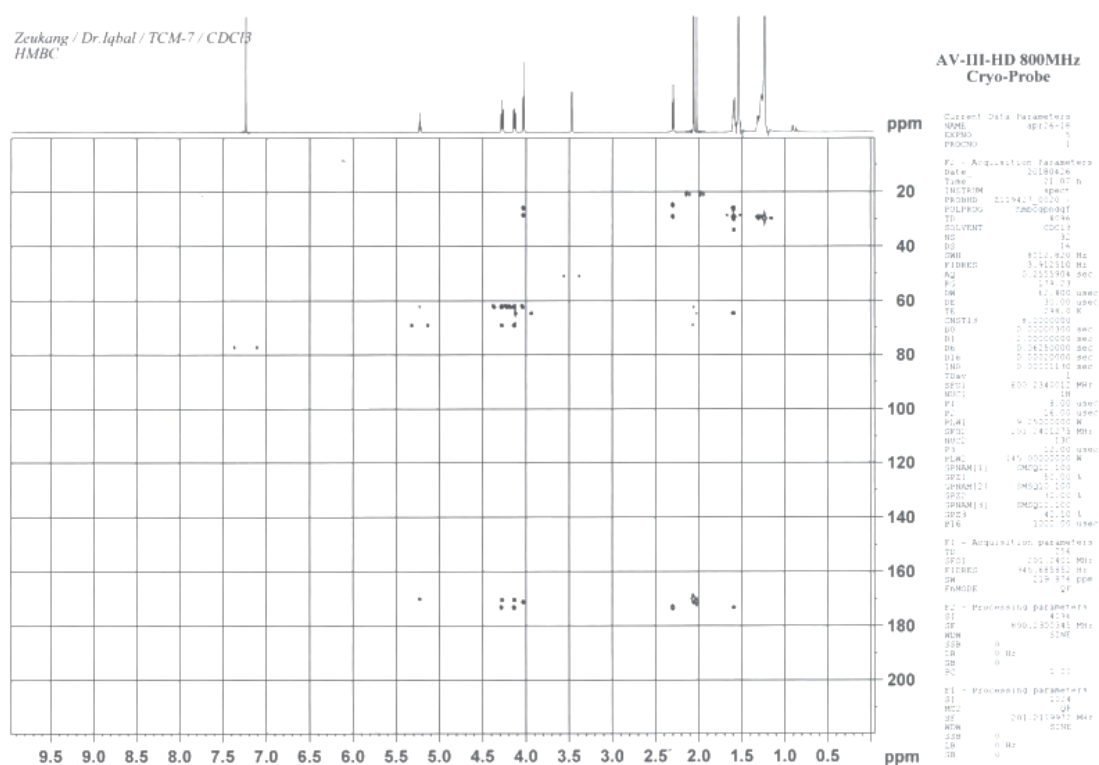

Figure S14. HMBC ( $^1\text{H}$ : 500 MHz,  $^{13}\text{C}$ : 200 MHz,  $\text{CDCl}_3$ ) spectrum of Cordicerol A (14)



Zeukang / Dr Iqbal / TCM-7 / CDCl<sub>3</sub>  
COSY

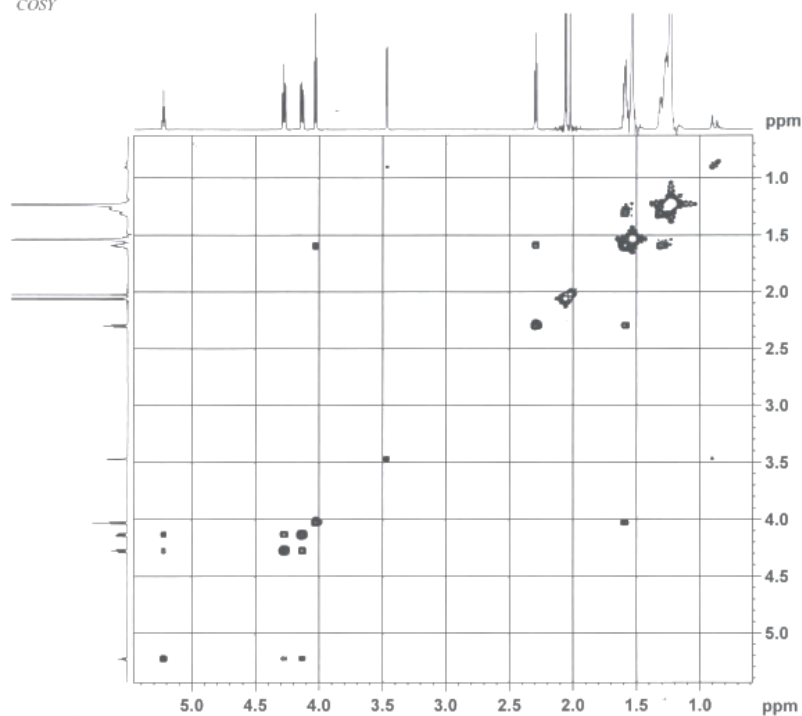

**Figure S15.** COSY (<sup>1</sup>H: 500 MHz, CDCl<sub>3</sub>) spectrum of Cordicerol A (**14**)

### Compound 15 (Cordicerol B)

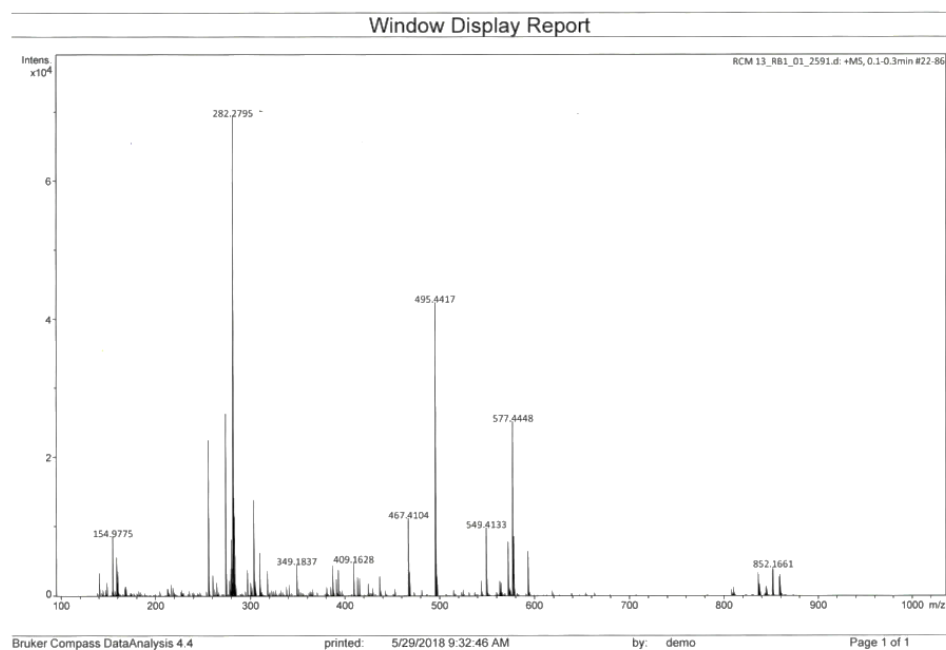

**Figure S16.** HR-ESI-MS of Cordicerol B (**15**)

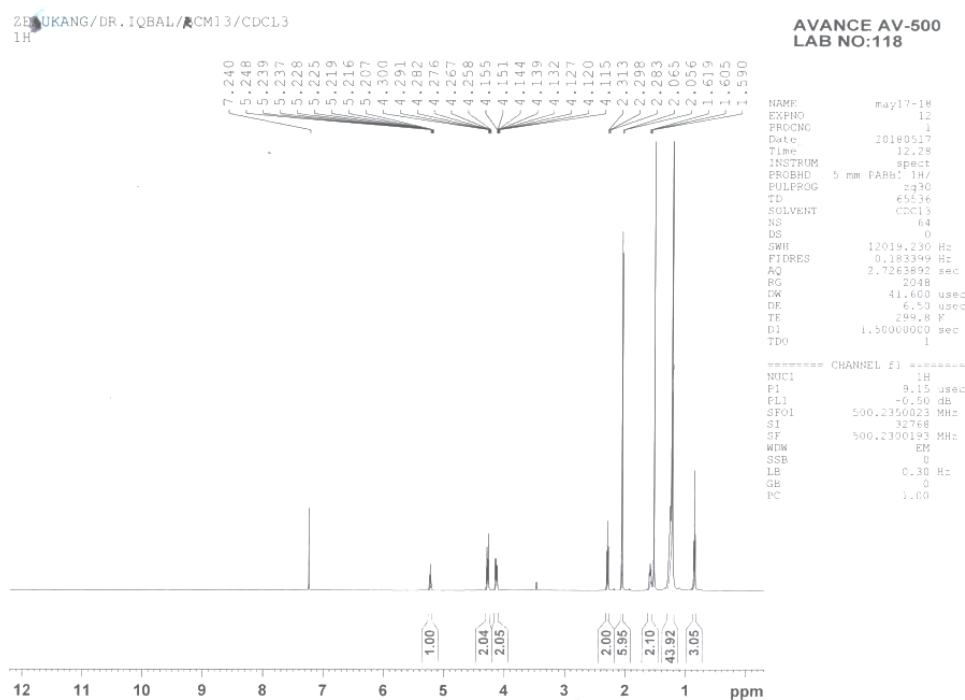

Figure S17. <sup>1</sup>H NMR (500 MHz, CDCl<sub>3</sub>) spectrum of Cordicerol B (15)

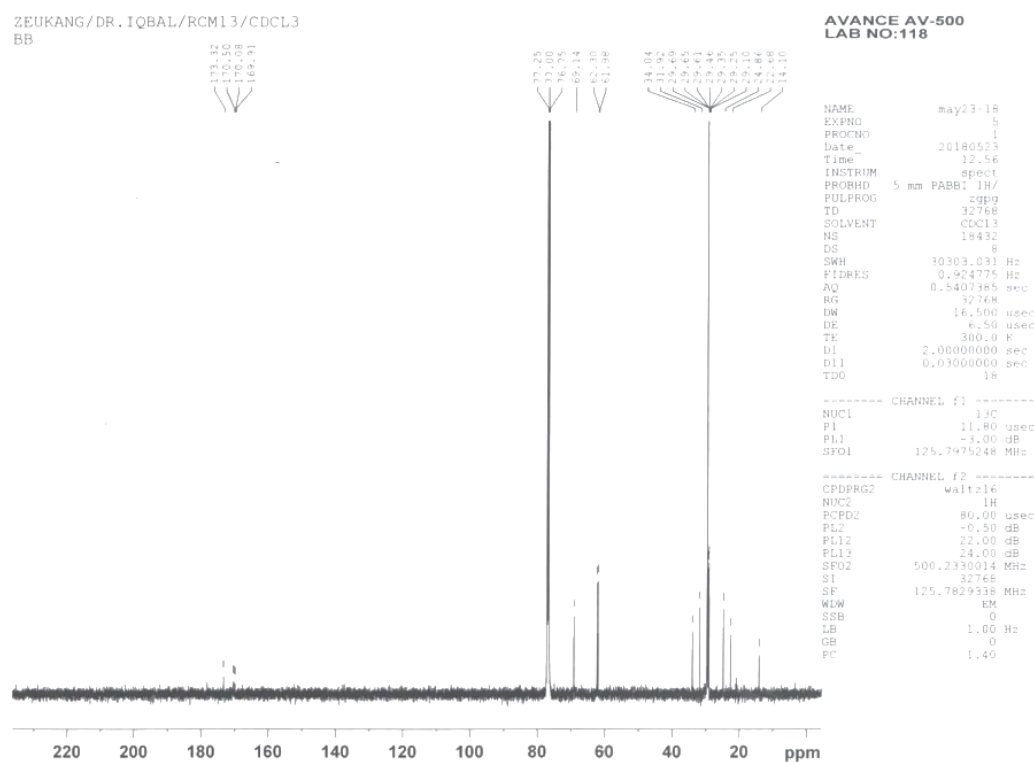

Figure S18. <sup>13</sup>C NMR (125 MHz, CDCl<sub>3</sub>) spectrum of Cordicerol B (15)



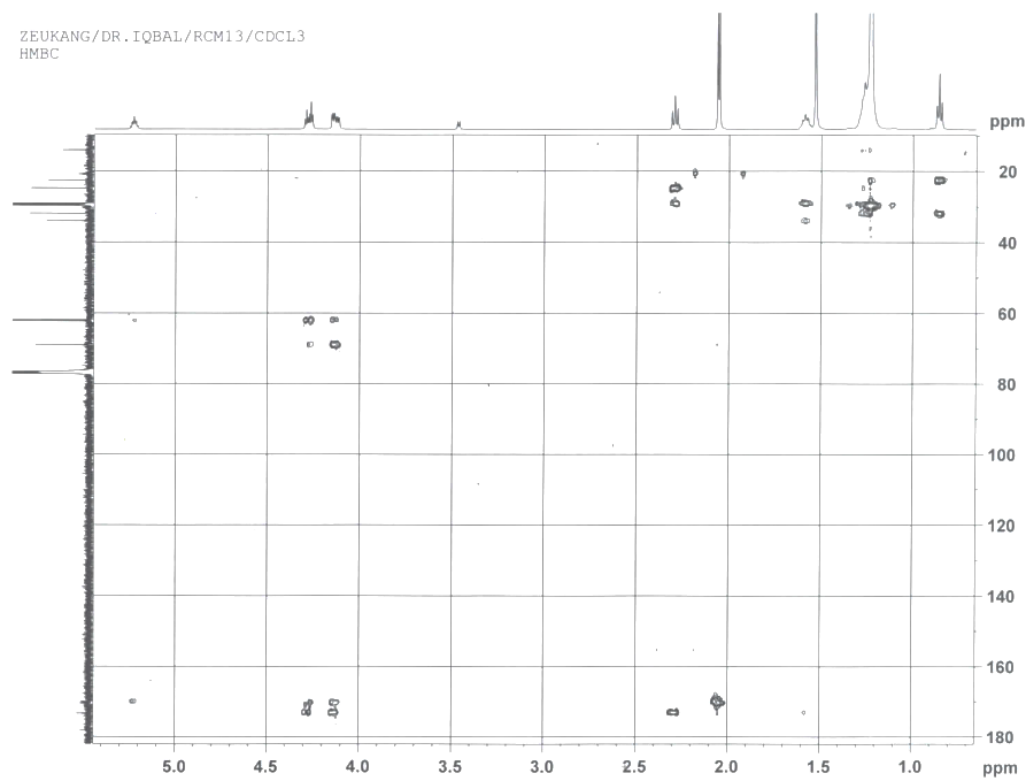

**Figure S21.** HMBC ( $^1\text{H}$ : 500 MHz,  $^{13}\text{C}$ : 125 MHz,  $\text{CDCl}_3$ ) spectrum of Cordicerol B (15)

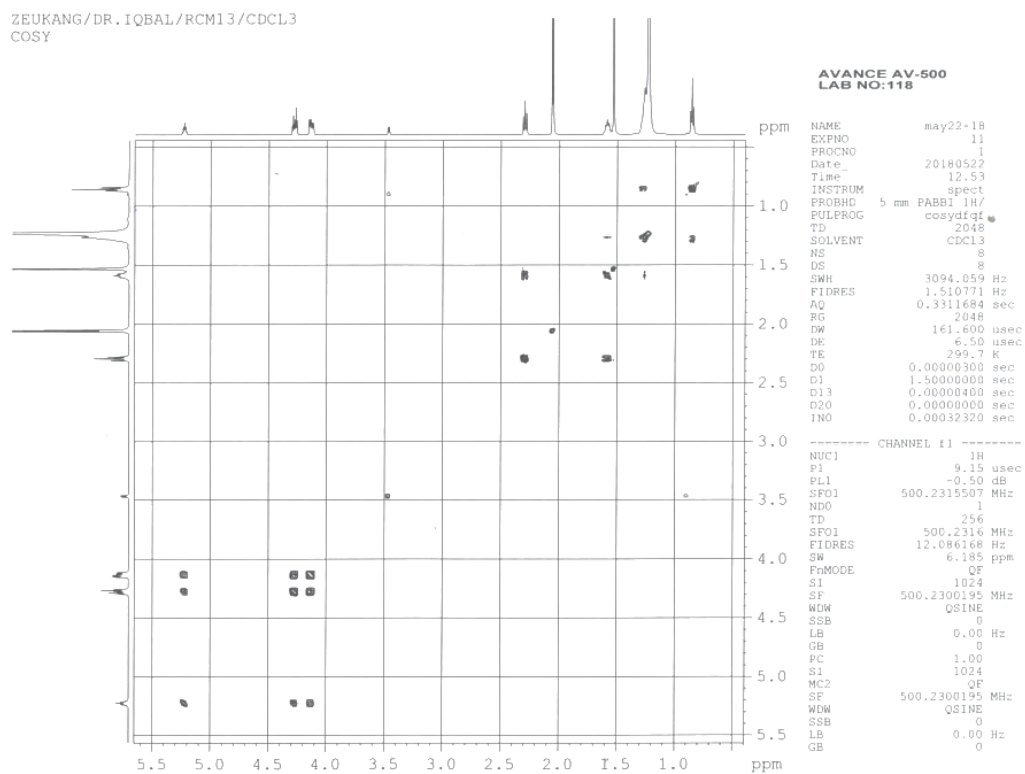

**Figure S22.** COSY ( $^1\text{H}$ : 500 MHz,  $\text{CDCl}_3$ ) spectrum of Cordicerol B (15)

**Compound 2 (Cyclooctasulfur)****Table S1.** Crystal data and structure refinement for cyclooctasulfur (2).

| 2                                               |                                              |
|-------------------------------------------------|----------------------------------------------|
| Formula                                         | S <sub>8</sub>                               |
| Formula weight                                  | 256.48                                       |
| T (K)                                           | 299(2)                                       |
| $\lambda$ (Å)                                   | 1.54178                                      |
| Crystal system                                  | Orthorhombic                                 |
| Space group                                     | Fddd                                         |
| Unit cell dimensions                            |                                              |
| a (Å)                                           | 10.4709(7)                                   |
| b (Å)                                           | 12.8709(8)                                   |
| c (Å)                                           | 24.484(2)                                    |
| $\alpha$ (°)                                    | 90                                           |
| $\beta$ (°)                                     | 90                                           |
| $\gamma$ (°)                                    | 90                                           |
| Z                                               | 16                                           |
| D <sub>calc</sub> (Mg/m <sup>3</sup> )          | 2.065                                        |
| Absorption coefficient (mm <sup>-1</sup> )      | 19.279                                       |
| F(000)                                          | 2048                                         |
| Crystal size (mm)                               | 0.16 x 0.07 x 0.06                           |
| $\theta$ (°)                                    | 5.74-66.64                                   |
| Limiting indices                                | -12 ≤ h ≤ 12<br>-15 ≤ k ≤ 15<br>-29 ≤ l ≤ 28 |
| Reflection collected/unique (R <sub>int</sub> ) | 10593/735 (0.0520)                           |
| Completeness to $\theta$ = 66.64                | 99.9%                                        |
| Maximum and minimum transmission                | 0.3909 and 0.1484                            |
| Refinement method                               | Full-matrix least-squares on F <sup>2</sup>  |
| Data/restraints/parameters                      | 735/0/8                                      |
| Goodness-of-fit (GOF) on F <sup>2</sup>         | 1.038                                        |
| Final R indices [I > 2 $\sigma$ (I)]            | R1 = 0.0178<br>wR2 = 0.0449                  |
| R indices (all data)                            | R1 = 0.0194<br>wR2 = 0.0457                  |
| Largest diff. peak and hole (eÅ <sup>-3</sup> ) | 0.255 and -0.239                             |

**Table S2.** Atomic coordinates ( $\text{\AA} \times 10^4$ ) and equivalent isotropic displacement parameters ( $\text{\AA}^2 \times 10^3$ ) for cyclooctasulfur (**2**).

| Atoms | x        | y       | z       | U(eq) |
|-------|----------|---------|---------|-------|
| S(2)  | 428(1)   | 4798(1) | 2459(1) | 39(1) |
| S(4)  | 359(1)   | 6577(1) | 3705(1) | 37(1) |
| S(1)  | -1058(1) | 4528(1) | 2986(1) | 38(1) |
| S(3)  | -341(1)  | 5303(1) | 1738(1) | 40(1) |

S: Atoms sulfur

x, y and z : atomic coordinates

U(eq) is defined as one third of the trace of the orthogonalized Uij tensor.

**Table S3.** Bond lengths [ $\text{\AA}$ ] and angles [ $^\circ$ ] for cyclooctasulfur (**2**).

| Bond lengths [ $\text{\AA}$ ] | angles [ $^\circ$ ] |
|-------------------------------|---------------------|
| S(2)-S(3)                     | 2.0461(6)           |
| S(2)-S(1)                     | 2.0502(6)           |
| S(4)-S(4)#1                   | 2.0466(8)           |
| S(4)-S(3)#2                   | 2.0477(6)           |
| S(1)-S(1)#3                   | 2.0422(8)           |
| S(3)-S(4)#4                   | 2.0477(6)           |
| S(3)-S(2)-S(1)                | 107.34(3)           |
| S(4)#1-S(4)-S(3)#2            | 108.99(2)           |
| S(1)#3-S(1)-S(2)              | 108.40(3)           |
| S(2)-S(3)-S(4)#4              | 107.99(2)           |

Symmetry transformations used to generate equivalent atoms:

#1 -x+1/4,-y+5/4,z #2 -x,y+1/4,z+1/4

#3 -x-1/4,-y+3/4,z #4 -x,y-1/4,z-1/4

**Table S4.** Torsion angles [ $^\circ$ ] for cyclooctasulfur (**2**).

|                       |            |
|-----------------------|------------|
| S(3)-S(2)-S(1)-S(1)#3 | 98.88(3)   |
| S(1)-S(2)-S(3)-S(4)#4 | -100.84(3) |
